# Supplementary material for: Neuromedin S Regulates Steroidogenesis through Maintaining Mitochondrial Morphology and Function via NMUR2 in Goat Ovarian Granulosa Cells
Source: MDPI journal article supplement (doi:10.3390/ijms232113402), 2022-11-02
Supplement: s1 [file s1]

# Neuromedin S Regulates Steroidogenesis through Maintaining Mitochondrial Morphology and Function via NMUR2 in Goat ovarian Granulosa Cells

Xuan Sun <sup>1</sup>, Cheng Zeng <sup>1,2</sup>, Feng Wang <sup>1</sup>, Zhen Zhang <sup>1</sup>, Fan Yang <sup>1</sup>, Zhi-Peng Liu <sup>1</sup>, Kang Li <sup>1</sup> and Guo-Min Zhang <sup>1,2,\*</sup>

<sup>1</sup> Jiangsu Livestock Embryo Engineering Laboratory, Nanjing Agricultural University, Nanjing 210095, China  
<sup>2</sup> College of veterinary medicine, Nanjing Agricultural University, Nanjing 210095, China  
\* Correspondence: zhangguomin@njau.edu.cn; Tel.: +86-025-84395381

**Table S1.** The nucleotide of amplified sequence and NCBI reference sequence blast results.

| Amplified<br>sequence genes | NCBI reference<br>sequence Accession | Max Score | Total Score | Query<br>Cover | Per. Ident | Acc. Len |
|-----------------------------|--------------------------------------|-----------|-------------|----------------|------------|----------|
| NMS                         | XM_005686290.2                       | 907       | 907         | 98%            | 99.20%     | 708      |
| NMUR1                       | XM_005676958.2                       | 2370      | 2370        | 100%           | 98.94%     | 1800     |
| NMUR2                       | XM_005683202.3                       | 1816      | 1816        | 99%            | 99.50%     | 2150     |

**Table S2.** Details of primer sequences, expected product sizes and Genebank accession numbers of gene cloning.

| Items | Primer sequence (5'-3')        | Genebank No.   | Fragment size (bp) |
|-------|--------------------------------|----------------|--------------------|
| NMS   | F: GGTGTCTTTGCCGGTGGAA         | XM_005686290.2 | 577                |
|       | R: ATTGCCTGATCCAGACTCGG        |                |                    |
| NMUR1 | F: GAGCGGATCCAGGAACCAAG        | XM_005676958.2 | 1383               |
|       | R: TTGGGGTGAAGCAGCATGAG        |                |                    |
| NMUR2 | F: GTCTTGCATTTTAATAGCAGTTATGGA | XM_005683202.3 | 1270               |
|       | R: AGAGTACAGAACCACACAGGGA      |                |                    |

**Table S3.** Accession number of amino acid sequence.

| Items  | NMS Genebank No. | NMUR1Genebank No. | NMUR2 enebank No. |
|--------|------------------|-------------------|-------------------|
| Goat   | ACS32212.1       | XP_005677015.2    | XP_005683259.1    |
| Cattle | NP_001070990.1   | XP_002685694.3    | NP_001030220.1    |
| Pig    | XP_020944053.1   | NP_001302643.1    | NP_001302544.1    |
| Human  | NP_001011717.1   | AAH36543.1        | NP_064552.3       |
| Mouse  | NP_001298717.1   | AAI37776.1        | AAI37612.1        |

**Table S4.** Details of siRNA sequences used for GCs transfection.

| Gene                        | Sense (5'-3')          | Antisense (5'-3')     |
|-----------------------------|------------------------|-----------------------|
| NMUR1-goat-974              | GGACACAGGUGACCAAGAUTT  | AUCUUGGUCACCUGUGUCCTT |
| NMUR1-goat-774<br>(siNMUR1) | CCCGAGAGCCAUCUACAAATT  | UUUGUAGAUGGCUCUCGGGTT |
| NMUR1-goat-1100             | UCCAGUACGUGCACGUCAUTT  | AUGACGUGCACGUACUGGATT |
| NMUR2-goat-650              | GCAUCAAGCUCCACUACUUTT  | AAGUAGUGGAGCUUGAUGCTT |
| NMUR2-goat-844<br>(siNMUR2) | GCAGAUAAAGUGACUGCAATT  | UUGCAGUCACUUUAUCUGCTT |
| NMUR2-goat-844<br>(siNMUR2) | CCAGAAAGGAACUCUCAATT   | UUUGAGAGUCCUUUCUGGTT  |
| YAP1-goat-1817<br>(siYAP1)  | CCGCCACCAAGCUAGAUAAATT | UUAUCUAGCUUGGUGGCGGTT |
| Negative control            | UUCUCCGAACGUGUCACGUTT  | ACGUGACACGUUCGGAGAATT |

**Table S5.** Details of primer sequences, expected product sizes and Genbank accession numbers of genes used for qPCR.

| Items | Primer sequence (5'-3')   | Genebank No.   | Fragment size (bp) |
|-------|---------------------------|----------------|--------------------|
| NMS   | F: ATTGTGAAGTTTGAGCGGATGG | XM_005686290.2 | 205                |
|       | R: CTGCCAGACGCATTAGAGGG   |                |                    |
| NMUR1 | F: GAGCGGATCCAGGAACCAAG   | XM_005676958.2 | 210                |
|       | R: AACAGAGAGGAACCTGAGCC   |                |                    |

|                |                              |                |     |
|----------------|------------------------------|----------------|-----|
| NMUR2          | F: GTGTTTGCTATCTGCTGGGC      | XM_005683202.3 | 320 |
|                | R: GGTAGAAGAAGACACCTGACACC   |                |     |
| STAR           | F: GGTCCCCGAGACTTTGTGAG      | XM_013975437.2 | 262 |
|                | R: AATCCACTTGGGTCTGCGAG      |                |     |
| CYP11A1        | F: CACTTTCGCCACATCGAGAAC     | NM_001287574.1 | 217 |
|                | R: AGGCTCCTGACTTCTTAAACAGG   |                |     |
| 3BHSD          | F: AGACCAGAAGTTCGGGAGGAA     | XM_013962473.2 | 292 |
|                | R: TCTCCCTGTAGGAGTTGGGC      |                |     |
| CYP19A1        | F: TGGTGTCCGAAGTTGTGCCTATTG  | XM_013967046.2 | 393 |
|                | R: AAGGTCGAACAGCTTCCAGAGTG   |                |     |
| MST1<br>(STK4) | F: TCAGATCAACAGCTTCGGCA      | XM_013968939.2 | 105 |
|                | R: ACCGTCCAGCTCTTCAGAAAC     |                |     |
| MST2<br>(STK3) | F: CAGCGCCCAAGAGTAAGCTA      | XM_018058284.1 | 148 |
|                | R: GCCACAACCTTGACCAGATTCC    |                |     |
| LATS1          | F: CTCATCAGCAACGTCTACATCG    | XM_018053335.1 | 70  |
|                | R: TCTTGAGATAATCCAACCCGCA    |                |     |
| LATS2          | F: AGTGCTCCTCCGAAAGGTTA      | XM_018056548.1 | 146 |
|                | R: GCGTGCTCTCCCAGTTAATC      |                |     |
| YAP1           | F: TGACCCTCGTTTTGCCATGA      | XM_018059884.1 | 128 |
|                | R: TCTGTTGCTGCTGGTTGGAA      |                |     |
| MFN1           | F: ATCAGGGAGGTTACAGAGGAGGTTG | XM_018047540.1 | 226 |

---

---

|       |                                                             |                |     |
|-------|-------------------------------------------------------------|----------------|-----|
|       | R: GGGATTGAAGCATTGAAGCGTTGAC                                |                |     |
| MFN2  | F: GTTGTTGGAGGAGTGGTGTGGAAG<br>R: TCTGGTTCATGGCGGCGATTTC3   | XM_018060333.1 | 301 |
| OPA1  | F: GAACGCAGCATTGTTACAGACTTGG<br>R: AGCCTGTTGTTCAACTGACTCTCG | XM_005675105.2 | 363 |
| DNM1L | F: TTCCAATTATGCCAGCCAGTCCAC<br>R: GTGCCATGTCCTCAGATTCAGTCAG | XM_018048322.1 | 294 |
| FIS1  | F: CTGAACGAGTTGGTGTCTGTGGAG<br>R: GGTTGTTCTGCGGCTCTGTCTG    | XM_005697811.3 | 304 |
| ClpP  | F: GGTGGAACAGACGGGTCG<br>R: GGGCTTCTTGTTGCTTTCCG            | XM_018050927.1 | 157 |
| PKR   | F: CCAAGCAACCAAAGAACCAGC<br>R: CTTTGATGCCCCCTTCCAGT         | XM_018055124.1 | 179 |
| JNK   | F: ATGGGCTACAAAGAGAACGTTGATA<br>R: ATTCCTCACAGTTGGCTGAAGT   | XM_018051622.1 | 177 |
| JUN   | F: GGAAACGACCTTCTACGACGATGC<br>R: CCGTTGCTGGACTGTATGATGAGG  | XM_018044742.1 | 243 |
| HSP60 | F: CGTTGCTGTGTTGAAGGTTGG<br>R: AAGGCTGGAATGCACCGAAG         | XM_018061271.1 | 153 |
| GAPDH | F: CCGTTCGACAGATAGCCGTAA<br>R: CCGTTCGACAGATAGCCGTAA        | XM_005680968.3 | 296 |

---

**Table S6.** Details of antibodies.

| Antibodies name                  | Cat NO.       | Source                    | Dilutions used | Dilutions used | Dilutions used |
|----------------------------------|---------------|---------------------------|----------------|----------------|----------------|
|                                  |               |                           | in IHC         | in WB          | in IF          |
| NMS antibody                     | DF4237        | LTD<br>(USA)              | 1:250          | 1:800          | 1:200          |
| Anti-NMUR1 antibody              | AF9133        | LTD<br>(USA)              | 1:250          | 1:1000         | 1:200          |
| NMUR2 polyclonal<br>antibody     | bs-11421R     | Bioss<br>(Beijing, China) | 1:250          | 1:500          | 1:200          |
| StAR polyclonal antibody         | bs-3570R      | Bioss<br>(Beijing, China) | –              | 1:1000         | –              |
| CYP11A1 polyclonal<br>antibody   | bs-10099R     | Bioss<br>(Beijing, China) | –              | 1:1000         | –              |
| Anti-HSD3B1 antibody             | NB110-78644SS | Novus<br>(USA)            | –              | 1:200          | –              |
| Cytochrome P450 19A1<br>antibody | DF6884        | LTD<br>(USA)              | –              | 1:2000         | –              |
| STK4/MST1 polyclonal<br>antibody | 22245-1-AP    | ProteinTech<br>(IL, USA)  | 1:200          | 1:2000         | 1:100          |
| STK3/MST2 polyclonal<br>antibody | 12097-1-AP    | ProteinTech<br>(IL, USA)  | 1:200          | 1:2000         | 1:200          |

|                                                  |              |                                     |       |        |       |
|--------------------------------------------------|--------------|-------------------------------------|-------|--------|-------|
| Anti-MST1/2(Phospho-Thr183) antibody             | D155304      | BBI<br>(Shanghai, China)            | –     | 1:500  | –     |
| LATS1 polyclonal antibody                        | 17049-1-AP   | ProteinTech<br>(IL, USA)            | 1:200 | 1:2000 | 1:100 |
| Anti-LATS2 antibody                              | D260914      | Sangon Biotech<br>(Shanghai, China) | 1:200 | 1:1000 | 1:100 |
| Anti-LATS1/2(Phospho-Ser909/872) antibody        | D155305      | BBI<br>(Shanghai, China)            | –     | 1:1000 | –     |
| YAP1 polyclonal antibody                         | 13584-1-AP   | ProteinTech<br>(IL, USA)            | 1:200 | 1:2000 | 1:100 |
| Anti-YAP1(Phospho-Ser127) antibody               | D151452      | BBI<br>(Shanghai, China)            | –     | 1:1000 | –     |
| PGC1 alpha polyclonal antibody                   | NBP1-04676SS | Novus<br>(USA)                      | –     | 1:500  | –     |
| Phospho-PGC1 $\alpha$ (S571) polyclonal antibody | AF6650-SP    | R&D systems<br>(USA)                | –     | 1:1000 | –     |
| NFN1 polyclonal antibody                         | 13798-1-AP   | ProteinTech<br>(IL, USA)            | –     | 1:1000 | –     |
| NFN2 polyclonal antibody                         | 12186-1-AP   | ProteinTech<br>(IL, USA)            | –     | 1:4000 | –     |
| OPA1 polyclonal antibody                         | 27733-1-AP   | ProteinTech                         | –     | 1:2000 | –     |

|                          |            |                  |   |        |   |
|--------------------------|------------|------------------|---|--------|---|
|                          |            | (IL, USA)        |   |        |   |
| DRP1(C-terminal)         | 12957-1-AP | ProteinTech      | – | 1:2000 | – |
| polyclonal antibody      |            | (IL, USA)        |   |        |   |
| FIS1 polyclonal antibody | 10956-1-AP | ProteinTech      | – | 1:2000 | – |
|                          |            | (IL, USA)        |   |        |   |
| CLPP polyclonal antibody | 15698-1-AP | ProteinTech      | – | 1:4000 | – |
|                          |            | (IL, USA)        |   |        |   |
| Anti-EIF2AK2(PKR)        | bs-1493R   | Bioss            | – | 1:500  | – |
| antibody                 |            | (Beijing, China) |   |        |   |
| JNK1/2/3 polyclonal      | 51153-1-AP | ProteinTech      | – | 1:1000 | – |
| antibody                 |            | (IL, USA)        |   |        |   |
| Phospho-                 |            |                  |   |        |   |
| JNK1/2/3(Thr183+Tyr185)  | AF3318     | LTD              | – | 1:500  | – |
| polyclonal antibody      |            | (USA)            |   |        |   |
| Phospho-JUN(Ser73)       | 28891-1-AP | ProteinTech      | – | 1:1000 | – |
| polyclonal antibody      |            | (IL, USA)        |   |        |   |
| HSP60 antibody           | AF5374     | LTD              | – | 1:1000 | – |
|                          |            | (USA)            |   |        |   |
| GAPDH Mouse              | 60004-1-Ig | ProteinTech      | – | 1:8000 | – |
| Monoclonal antibody      |            | (IL, USA)        |   |        |   |

|                       |           |             |       |        |   |
|-----------------------|-----------|-------------|-------|--------|---|
| HRP-conjugated        |           |             |       |        |   |
| Affinipure Goat Anti- | SA00001-2 | ProteinTech | -     | 1:5000 | - |
| Rabbit IgG(H+L)       |           | (IL, USA)   |       |        |   |
| HRP-conjugated        |           |             |       |        |   |
| Affinipure Goat Anti- | SA00001-1 | ProteinTech | -     | 1:5000 | - |
| Mouse IgG(H+L)        |           | (IL, USA)   |       |        |   |
| Goat Anti- Rabbit IgG | ab96886   | Abcam       | 1:100 | -      | - |
| H&L (DyLight® 650)    |           | (IL, USA)   |       |        |   |

IHC: immunohistochemistry, WB: Western blot, IF: immunocytochemistry, (-): absent.





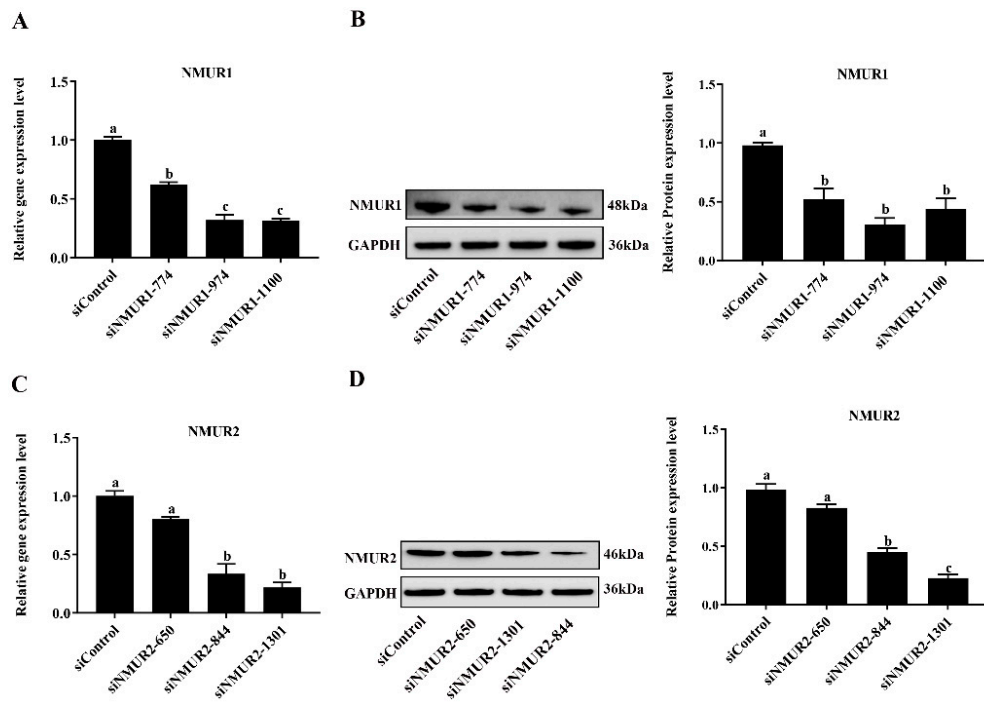

**Figure S2.** NMS receptors interference efficiency verification in goat granulosa cells. (A) The mRNA expression of NMUR1 in goat GCs under siNMUR1-774, siNMUR1-974, and siNMUR1-1100 treatment was determined by qPCR. (B) The protein expression of NMUR1 in goat CSs under siNMUR1-774, siNMUR1-974, and siNMUR1-1100 treatment was shown by western blot. (C) The mRNA expression of NMUR2 in goat GCs under siNMUR2-650, siNMUR2-844, and siNMUR2-1301 treatment was determined by qPCR. (D) The protein expression of NMUR2 in goat GCs under siNMUR2-650, siNMUR2-844, and siNMUR2-1301 treatment was shown by western blot. The data are expressed as fold change. Data are presented as mean  $\pm$  S.E.M. of the results obtained in at least three independent experiments. Different letters indicate significant differences in the expressions between the groups ( $P < 0.05$ ).

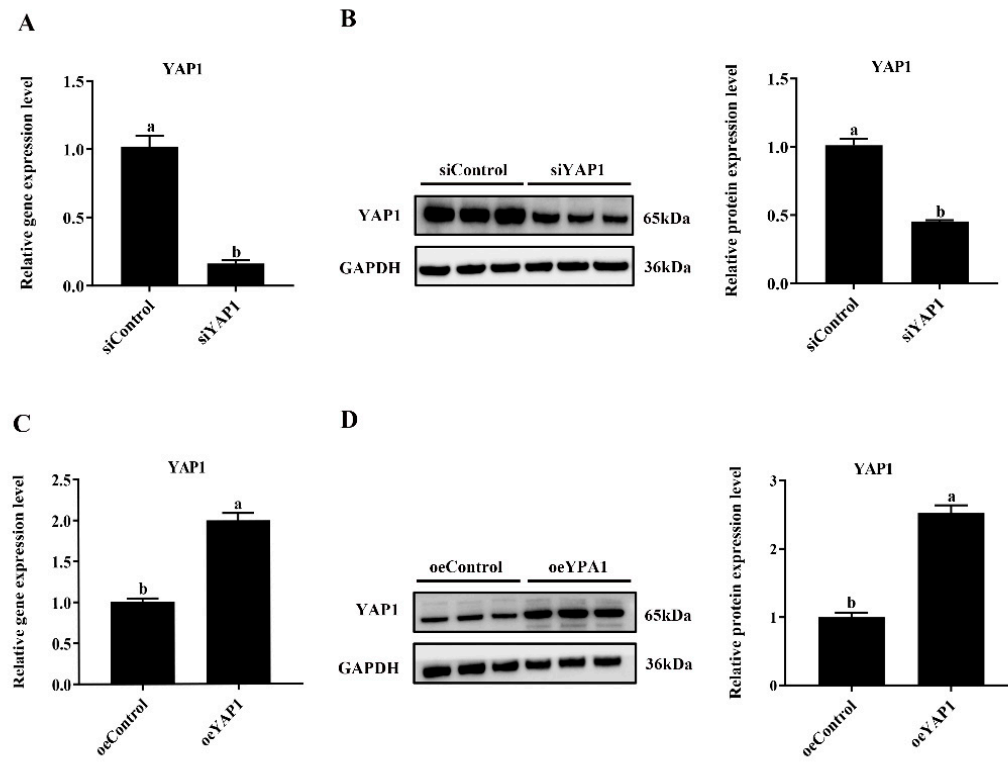

**Figure S3.** YAP1 interference and overexpression efficiency verification in goat granulosa cells. (A) The mRNA expression of YAP1 in goat GCs under siYAP1-1817 treatment was determined by qPCR. (B) The protein expression of YAP1 in goat GCs under siYAP1-1817 treatment was determined by western blot. (C) The mRNA expression of oeYAP1 treatment in goat GCs was determined by qPCR. (D) The protein expression of oeYAP1 treatment in goat GCs was determined by western blot. Data are presented as mean  $\pm$  S.E.M. value from at least three individuals. Different letters indicate significant differences in the expressions between the groups ( $P < 0.05$ ).
